# Supplementary material
Source: PubMed Central journal article supplement (PMC2874445)

**Barbro N. Melgert\*‡, Timothy B. Oriss\*, Zengbiao Qi\*, Barbara Dixon-McCarthy\*, Marie Geerlings‡, Machteld N. Hylkema‡, and Anuradha Ray\*†**

### **Supplemental data figure legends**

#### **Figure S1**

**A:** Phenotype of Tregs and effector T cells isolated from lung tissue 24 h after the last OVA aerosol treatment. Cells were gated from lymphocytes positive for CD4.

**B:** Phenotype of mDC and pDC isolated from LDLN 24 h after the last OVA aerosol treatment.

**C:** Phenotype of mDC and pDC isolated from LDLN 24 h after the last treatment with OVA and CT.

**Figure S2:** : Female mice (n=14) with OVA-induced airway inflammation have slightly elevated numbers of total CD4<sup>+</sup> T cells in lung tissue as compared to their male counterparts (n=13), though the difference did not reach statistical significance.

**Figure S3:** : Untreated male and female control mice (n=8) have equal numbers of AAMΦ in lung tissue, as judged by counting YM1-positive cells in lung tissue sections.

**Figure S1**

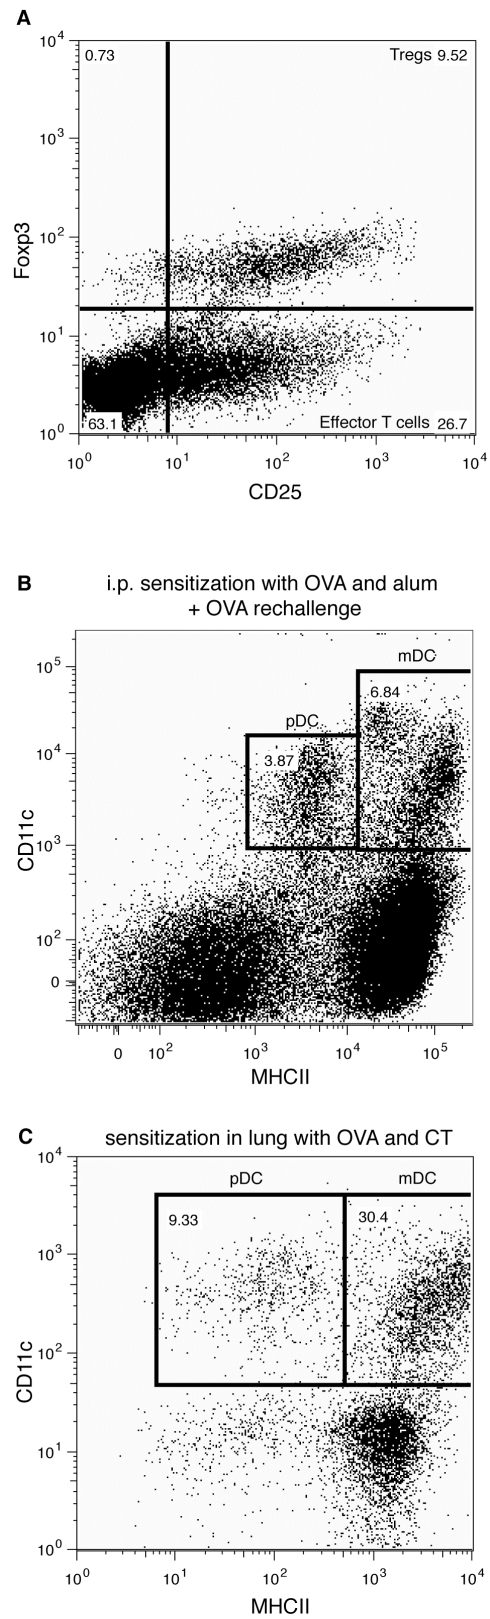

Figure S2

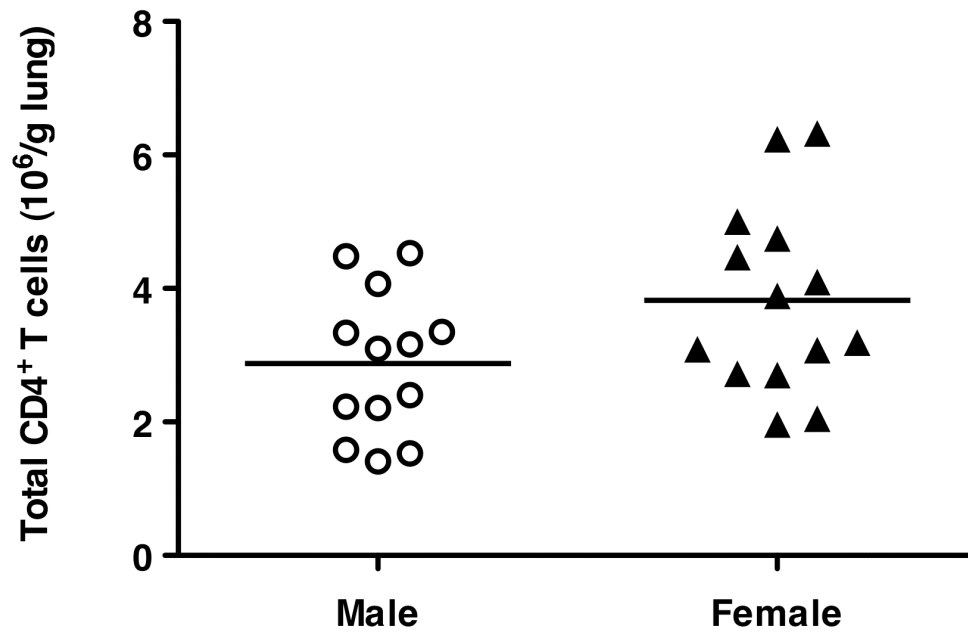

**Figure S3**

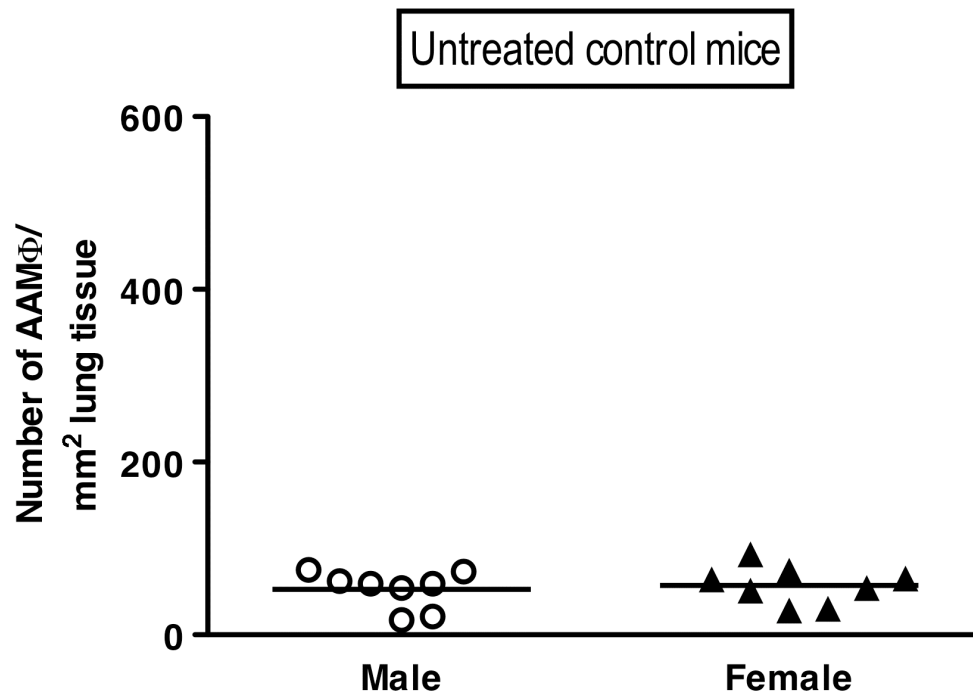

Supplement: supp_42_5_595__1.pdf [file supp_42_5_595__1.pdf]
